# Supplementary material for: Escherichia coli-Derived Outer Membrane Vesicles Relay Inflammatory Responses to Macrophage-Derived Exosomes
Source: PubMed Central journal article supplement (PMC9973271; doi:10.1128/mbio.03051-22), 2023-01-17

**a**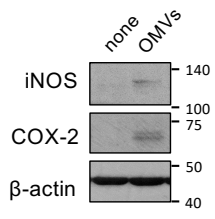**b**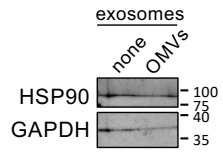**c**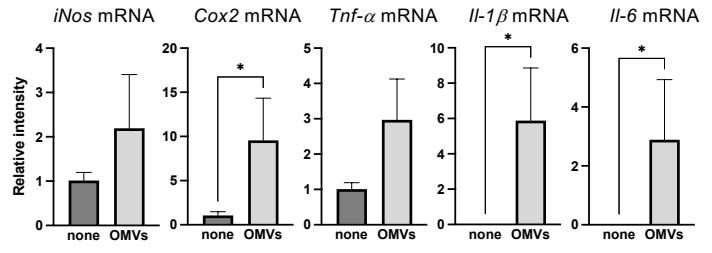

Supplement: mbio.03051-22-s0003.pdf [file mbio.03051-22-s0003.pdf]
